# Supplementary material
Source: Springer Nature journal article supplement (https://www.springermedizin.de/resource/supplementary/12877_2007_79_MOESM2_ESM.pdf/9441130)

**A**

5x

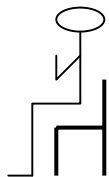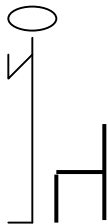**B**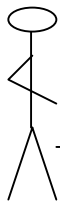

3m

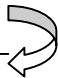**C**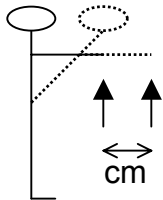**D**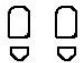

1

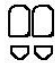

2

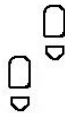

3

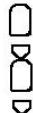

4

Supplement: MOESM2 [file 9441130]
